# Supplementary material
Source: PubMed Central journal article supplement (PMC394249)
Supplement: 7600195s2.pdf [file 7600195s2.pdf]

## Supplementary Material Fig. 2

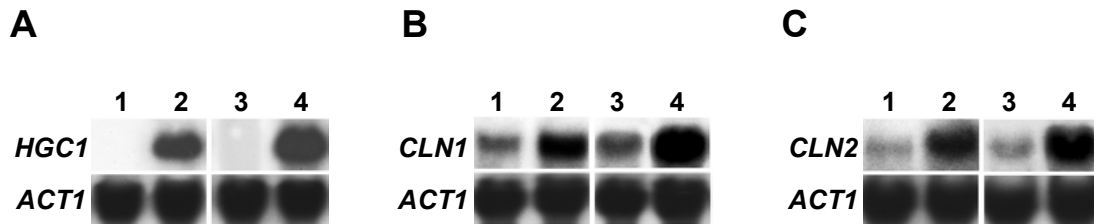

Fig. 2. (A) Northern blot confirmation of constitutive *HGC1* expression driven by *CaACT1* promoter in CAI4 and *hgc1Δ* (*hgc1Δ::ARG4/hgc1Δ::HIS1*) mutant strains. Lane 1, strain CAI4; lane 2, CAI4 transformed with a copy of *HGC1* driven by *CaACT1* promoter; lane 3, *hgc1Δ* mutant; and lane 4, *hgc1Δ* mutant transformed with a copy of *HGC1* driven by *CaACT1* promoter. All strains were grown in YPD at 30°C. (B) Northern blot confirmation of the constitutive and hypha-induced expression of *CaCLN1* driven by *CaACT1* or *HGC1* promoter. Lane 1: *hgc1Δ* mutant grown in YPD at 30°C; lane 2, *hgc1Δ* mutant transformed with a copy of *CaCLN1* driven by *CaACT1* promoter and grown in YPD at 30°C; lane 3, *hgc1Δ* mutant transformed with a copy of *CaCLN1* driven by *HGC1* promoter and grown in YPD at 30°C; and lane 4: *hgc1Δ* mutant transformed with a copy of *CaCLN1* driven by *HGC1* promoter and grown in YPD+10% serum at 37°C for 1h. The signal observed in lanes 1 and 3 are due to the expression from the endogenous copies of *CaCLN1*. (C) Northern blot confirmation of the constitutive and hypha-induced expression of *CaCLN2* driven by *CaACT1* or *HGC1* promoter. The strains and growth conditions used were the same as those described in (B) except that *CaCLN1* was replaced with *CaCLN2*. All the cyclin genes transformed into the *hgc1Δ* mutant were cloned in plasmid Clp10 and integrated at the *RPI10* gene locus.
